# Supplementary material for: Kinetics and mechanisms of the electron transfer reactions of oxo-centred carboxylate bridged complexes, [Fe3(µ3-O)(O2CR)6L3]ClO4, with verdazyl radicals in acetonitrile solution
Source: Royal Society of Chemistry journal article supplement (doi:10.1039/b418809h), 2005-01-01
Supplement: b418809h.doc [file b418809h.doc]

Kinetics and mechanisms of the electron transfer reactions of oxo-centred carboxylate bridged clusters, [Fe3(μ-O)(O2CR)6L3]ClO4,with verdazyl radicals in acetonitrile solution.

# Lynette Keeney and Michael J. Hynes*

# Department of Chemistry, National University of Ireland, Galway, Ireland

**Electronic Supplementary Information**

**Fig. S1** Cyclic voltammogram of 5.0 x 10–4 mol dm–3 [Fe3(3‑O)(O2CCH2CN)6(3‑Mepy)3]0/1+ in 0.2 mol dm–3 (*n*C4H9)4NPF6-acetonitrile, **(a)** in the absence of free 3‑methylpyridine **(b)** in the presence of 5.0 x 10–3 mol dm–3 free 3‑methylpyridine.


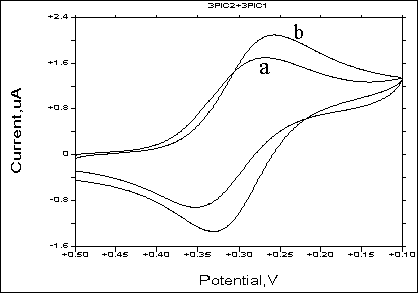


**Fig. S2** Plot of *E* [Fe3(3–O)(O2CCH2CN)6(L)3]0/1+ *vs*. ligand *pK*a values.

**
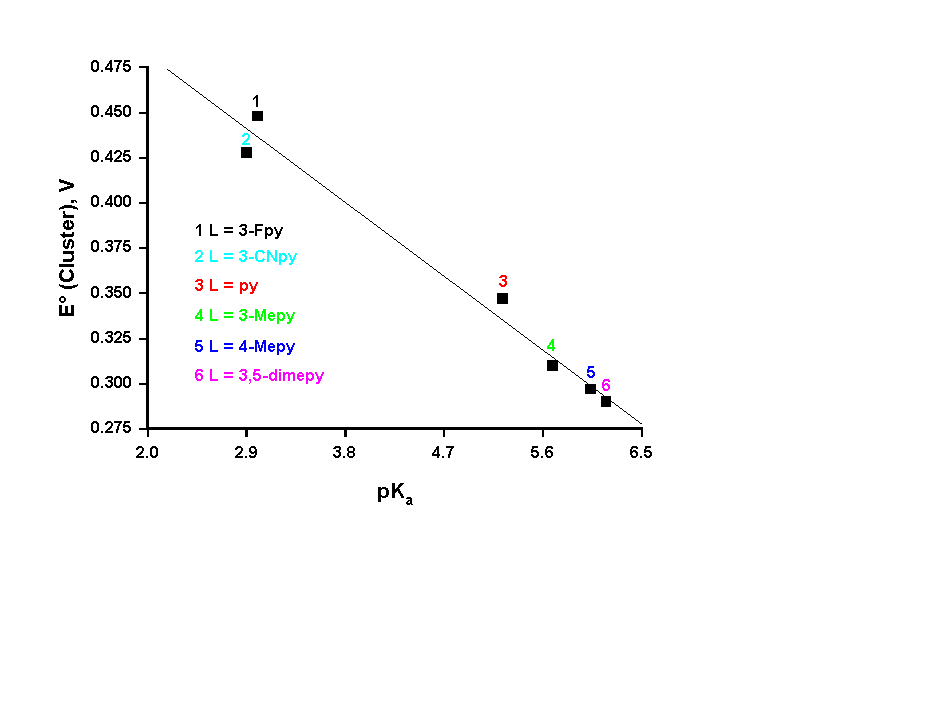
**

**Fig. S3** Marcus plot of (2log*k*AB *–* log*f*AB *–* 2log*W*AB *–* log*k*AA) against log *K*AB for reaction of [FeIII2FeII(3–O)(O2CC(CH3)3)6(py)3] with [Co(N–N)3]3+ in the presence of a 100-fold excess of pyridine at 25ºC and I = 0.05 mol dm–3 (nC4H9)4NPF6.


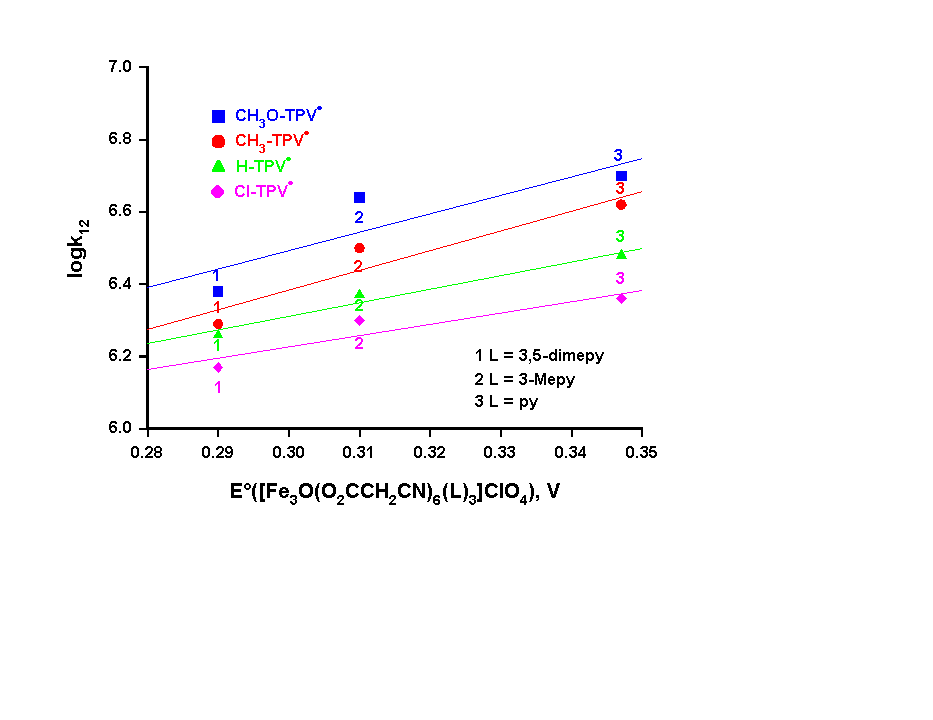
**Fig. S4** Plot of the log of the cross-reaction rate constant (log *k*12) for reaction of X‑TPV with [Fe3(3–O)(O2CCH2CN)6(L)3]+ as a function of the reduction potential (*E*) of [Fe3(3‑O)(O2CCH2CN)6(L)3]+ in the presence of a 10-fold excess of L in acetonitrile at 25ºC.

**Fig. S5** Plot of the log of the cross-reaction rate constant (log *k*12) for reaction of X‑TPV with [Fe3(3–O)(O2CCH2CN)6(L)3]+ as a function of the reduction potential (*E*) of X‑TPV in the presence of a 10-fold excess of L in acetonitrile at 25ºC


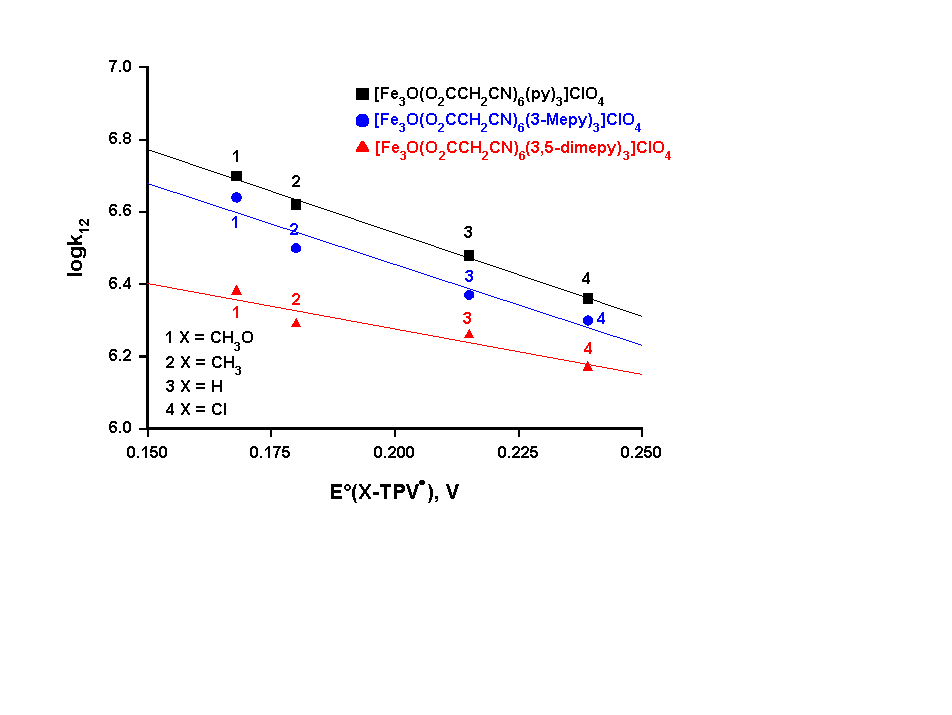


**Fig. S6** Plot of the log of the cross-reaction rate constant (log *k*12) for reaction of X‑TPV with [Fe3(3–O)(O2CCH2R)6(py)3]+ as a function of the reduction potential (*E*) of [Fe3(3‑O)(O2CCH2R)6(py)3]+ in the presence of a 10-fold excess of pyridine in acetonitrile at 25ºC

**
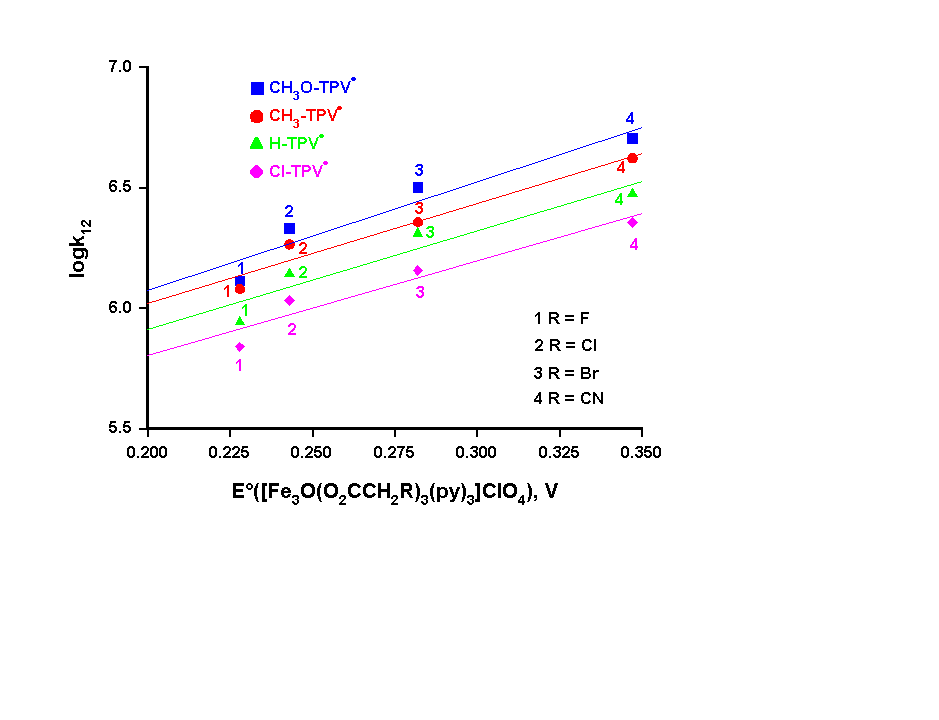
**

**Fig. S7** Plot of the log of the cross-reaction rate constant (log *k*12) for reaction of X‑TPV with [Fe3(3–O)(O2CCH2R)6(py)3]+ as a function of the reduction potential (*E*) of X‑TPV in the presence of a 10-fold excess of pyridine in acetonitrile at 25ºC


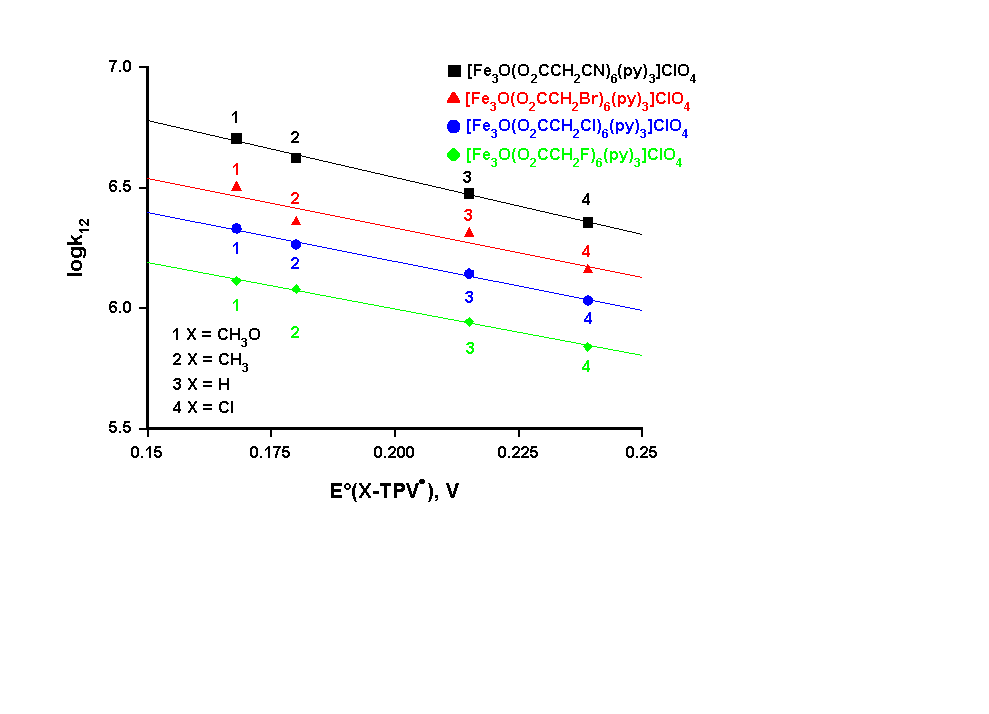


**Fig. S8** The effect of varying the terminal ligand of the tri-iron cluster: Marcus plot of log *k*12 against log *K*12 for reaction of X‑TPV**** and [Fe3(3‑O)(O2CCH2CN)6(L)3]+ in the presence of ten-fold excess L in acetonitrile at 25C.

**
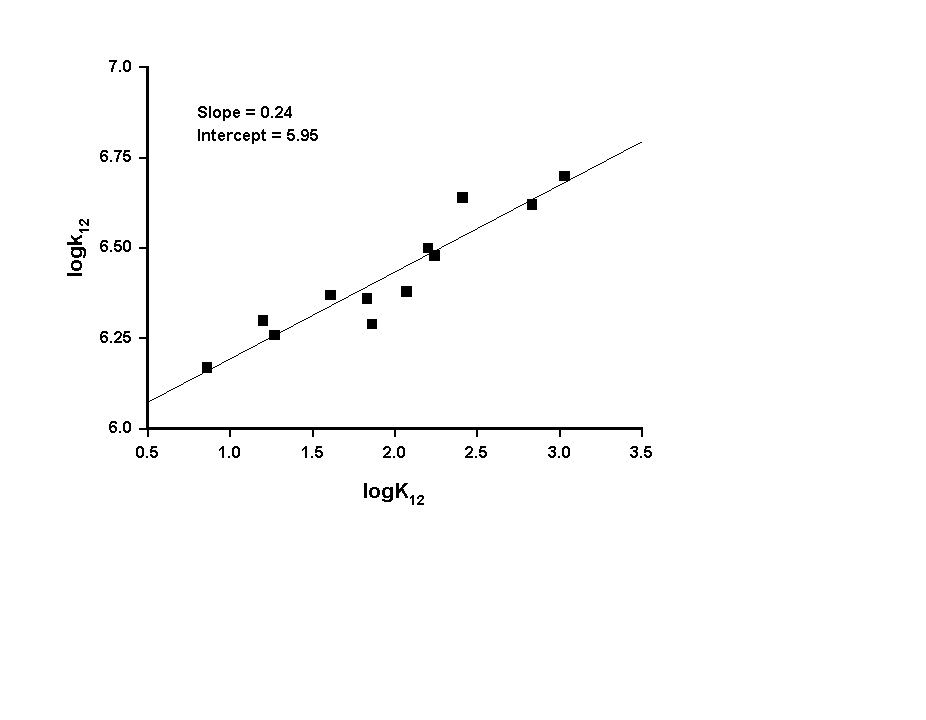
**

**Figure S9** The effect of varying the carboxylate bridge of the tri-iron cluster: Marcus plot of log *k*12 against log *K*12 for reaction of X‑TPV**** and [Fe3(3‑O)(O2CR)6(py)3]+ in the presence of ten-fold excess pyridine in acetonitrile at 25C.


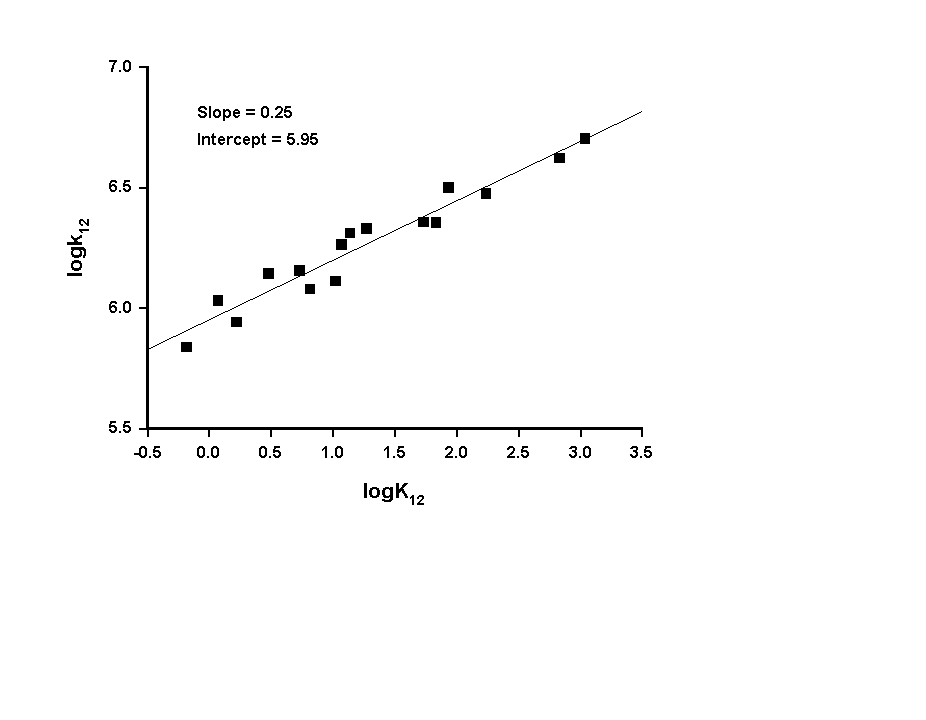


**Table S1** pKa values of pyridines at 25C in H2O and zero ionic strength.

| **Ligand** | **pKa** |
| --- | --- |
| Pyridine | 5.23 1 |
| 2‑Methylpyridine | 5.95 1 |
| 3‑Methylpyridine | 5.68 1 |
| 4‑Methylpyridine | 6.03 1 |
| 3,5‑Dimethylpyridine | 6.17 1 |
| 3‑Cyanopyridine | 2.90 1 |
| 3-Fluoropyridine | 3.00 2 |

### References

1.R. M. Smith and A. E. Martell, 'Critical Stability Constants', Plenum Press, New York, 1975.

2.H. M. Mertel, 'Pyridine and its Derivatives Part 2', ed. E. Klingsberg, Interscience Publishers, New York, 1961.
